# Supplementary material for: De novo genes with an lncRNA origin encode unique human brain developmental functionality
Source: PubMed Central journal article supplement (PMC9911349; doi:10.1038/s41559-022-01925-6), 2023-01-02

Figure 1b

Human brain-laminB

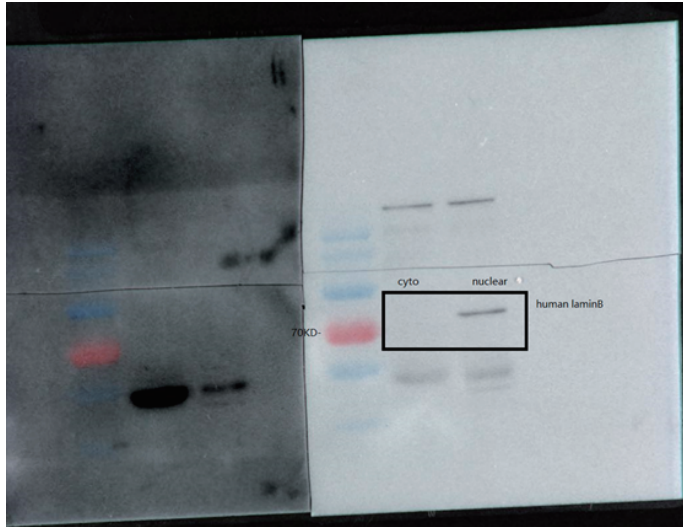

Human brain-tubulin

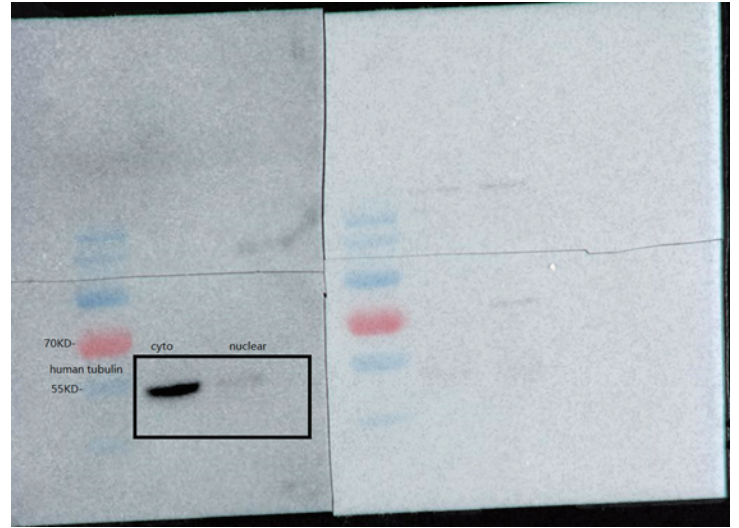

Macaque brain-laminB

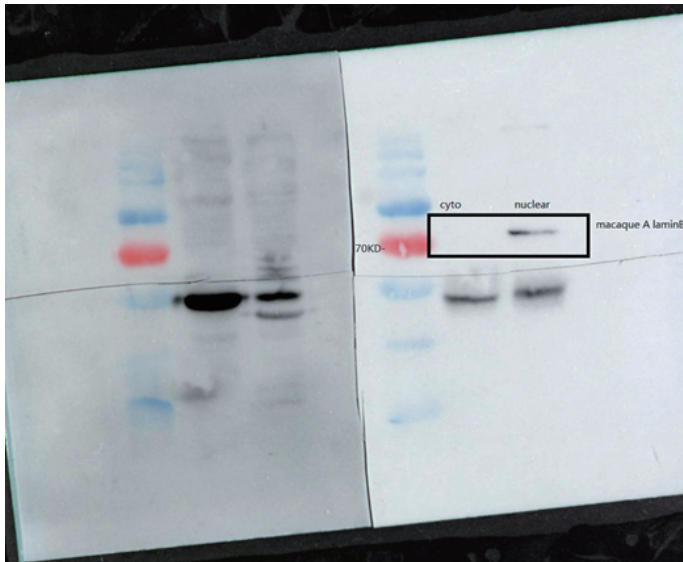

Macaque brain-tubulin

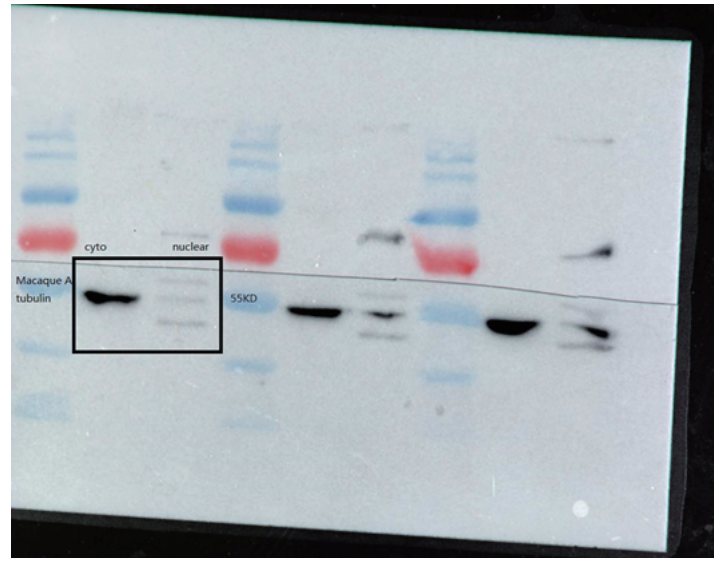

Supplement: 41559_2022_1925_MOESM4_ESM.pdf [file 41559_2022_1925_MOESM4_ESM.pdf]
